# Supplementary material for: Coordination during group departures and progressions in the tolerant multi-level society of wild Guinea baboons (Papio papio)
Source: PubMed Central journal article supplement (PMC8578668; doi:10.1038/s41598-021-01356-6), 2021-11-09
Supplement: 41598_2021_1356_MOESM1_ESM.pdf [file 41598_2021_1356_MOESM1_ESM.pdf]

**Electronic Supplemental Materials for:** Coordination during group departures and progressions in the tolerant multi-level society of wild Guinea baboons (*Papio papio*)

Davide Montanari, William J. O’Hearn, Julien Hambuckers, Julia Fischer & Dietmar Zinner

**Table S1.** Effects of age (adult, young) and sex/reproductive status (primary male, bachelor male, female), as well as unit size, and time of day on the likelihood of successfully initiating a group departure. Estimated coefficients, standard errors, confidence intervals, and test statistics.

|                                   | Estimate | Std. Error | CI <sub>lower</sub> | CI <sub>upper</sub> | $\chi^2$ | P      |
|-----------------------------------|----------|------------|---------------------|---------------------|----------|--------|
| Intercept                         | 2.03323  | 1.06705    | -0.058              | 4.12                | (1)      | (1)    |
| sex/reproductive status: Bachelor | 0.46843  | 0.98386    | -1.460              | 2.397               | 0.365    | 0.6340 |
| sex/ reproductive status: Female  | -0.14485 | 0.53625    | -1.196              | 0.906               | (2)      | 0.7871 |
| unit size                         | -0.13940 | 0.25105    | -0.631              | 0.353               | 0.306    | 0.5787 |
| z.time                            | -0.05438 | 0.27133    | -0.586              | 0.477               | 0.040    | 0.8411 |
| l(z.time^2)                       | 0.20069  | 0.28039    | -0.348              | 0.750               | 0.672    | 0.4742 |

**Table S2.** Summary of linear mixed model results. Coefficient estimates of the effect of belonging to the same unit, on the time interval between two individuals joining a group departure event.

|                            | Estimate | Std. Error | CI <sub>lower</sub> | CI <sub>upper</sub> | Df      | t value | Pr(> t ) |
|----------------------------|----------|------------|---------------------|---------------------|---------|---------|----------|
| (Intercept)                | 2.303    | 0.076      | 2.150               | 2.458               | 50.475  | 29.947  | < 2e-16  |
| Belonging to the same unit | -0.394   | 0.078      | -0.549              | -0.238              | 554.001 | -5.016  | 7.11e-07 |

**Table S3.** Estimated probabilities to travel in the rear, middle, or front third of a group progression according to age (adult, young). Values are calculated from the posterior mean values of the model.

|       | Rear  | Middle | Front |
|-------|-------|--------|-------|
| Adult | 0.316 | 0.292  | 0.391 |
| Young | 0.339 | 0.337  | 0.322 |

**Table S4.** Estimated probabilities to travel in the rear, middle, or front third of a group progression according to sex/reproductive status (female, primary male, bachelor male). Values are calculated from the posterior mean values of the model.

|               | Rear  | Middle | Front |
|---------------|-------|--------|-------|
| Female        | 0.333 | 0.346  | 0.321 |
| Primary male  | 0.322 | 0.281  | 0.397 |
| Bachelor male | 0.246 | 0.168  | 0.585 |

**Table S5.** Summary of linear mixed model results. Coefficient estimates of the effect of belonging to the same unit, on the time interval between two individuals traveling in a group progression event.

|                            | Estimate | Std. Error | CI <sub>lower</sub> | CI <sub>upper</sub> | Df      | t value | Pr(> t ) |
|----------------------------|----------|------------|---------------------|---------------------|---------|---------|----------|
| (Intercept)                | 1.598    | 0.044      | 1.51                | 1.685               | 124.66  | 36.2    | <2e-16   |
| Belonging to the same unit | -0.500   | 0.032      | -0.565              | -0.436              | 817.282 | -15.24  | <2e-16   |
